# Supplementary material for: Application of GC–TOF/MS and GC×GC–TOF/MS to Discriminate Coffee Products in Three States (Bean, Powder, and Brew)
Source: MDPI journal article supplement (doi:10.3390/foods12163123), 2023-08-20
Supplement: s1 [file s1]

**Table S1 Identified pyridine, pyrrole, pyrazine, alcohol, phenol, furan, and sulfur-containing compounds in three brands of coffee (CO, PA, ST) under three statuses (bean, powder, and brew) using GC-TOF/MS (µg).**

| No.           | Compounds                                  | RI   | Bean         |             |            | Powder       |             |            | Brew       |             |            |
|---------------|--------------------------------------------|------|--------------|-------------|------------|--------------|-------------|------------|------------|-------------|------------|
|               |                                            |      | CO           | PA          | ST         | CO           | PA          | ST         | CO         | PA          | ST         |
| Pyridine (2)  |                                            |      |              |             |            |              |             |            |            |             |            |
| 1             | Pyridine                                   | 1170 | 1.1617±0.102 | 1.207±0.08  | 1.1982±0.0 | 3.7682±0.37  | 4.1309±0.92 | 3.0697±0.3 | 0.1028±0.0 | ND          | ND         |
|               |                                            |      | 58           | 07          | 59         |              | 19          | 052        | 097        |             |            |
| 2             | 3-ethylpyridine                            | 1372 | 0.0148±0.000 | 0.0908±0.00 | 0.0361±0.0 | 0.1751±0.030 | 0.1387±0.03 | ND         | ND         | ND          | ND         |
|               |                                            |      | 14           | 1           | 048        | 61           | 25          |            |            |             |            |
| Pyrrole (3)   |                                            |      |              |             |            |              |             |            |            |             |            |
| 3             | 1H-pyrrole, 1-(2-furanmethyl)-             | 1802 | 0.0537±0.000 | 0.1166±0.00 | 0.0555±0.0 | 0.2398±0.030 | 0.2167±0.05 | 0.1326±0.0 | 0.0164±0.0 | 0.0757±0.02 | 0.1802±0.1 |
|               |                                            |      | 3            | 28          | 046        | 39           | 26          | 146        | 004        | 32          | 132        |
| 4             | 1H-pyrrole, 1-methyl-                      | 1121 | ND           | 0.2839±0.00 | 0.117±0.02 | ND           | ND          | ND         | ND         | ND          | ND         |
|               |                                            |      |              | 16          | 88         |              |             |            |            |             |            |
| 5             | Pyrrole                                    | 1495 | 0.0420±0.000 | 0.1319±0.00 | 0.0679±0.0 | ND           | ND          | ND         | ND         | ND          | ND         |
|               |                                            |      | 1            | 22          | 05         |              |             |            |            |             |            |
| Pyrazine (13) |                                            |      |              |             |            |              |             |            |            |             |            |
| 6             | 1,3-diazine                                | 1201 | ND           | ND          | 0.1753±0.0 | ND           | 0.6645±0.14 | ND         | ND         | ND          | ND         |
|               |                                            |      |              |             | 113        |              | 69          |            |            |             |            |
| 7             | 5-methyl-6,7-dihydro-5H-cyclopentopyrazine | 1599 | 0.0101±0.000 | 0.0151±0.00 | 0.0078±0.0 | ND           | ND          | ND         | ND         | ND          | ND         |
|               |                                            |      | 14           | 04          | 01         |              |             |            |            |             |            |
| 8             | Pyrazine                                   | 1201 | 0.1668±0.02  | ND          | ND         | 0.7077±0.07  | ND          | ND         | ND         | ND          | ND         |
|               |                                            |      | 05           |             |            | 18           |             |            |            |             |            |
| 9             | Pyrazine 2-(n-propyl)-                     | 1404 | ND           | 0.0641±0.00 | ND         | ND           | ND          | ND         | ND         | ND          | ND         |
|               |                                            |      |              | 1           |            |              |             |            |            |             |            |
| 10            | 2,3-dimethylpyrazine                       | 1336 | 0.2072±0.010 | 0.3843±0.00 | ND         | 0.6846±0.130 | 0.7045±0.15 | 0.5802±0.0 | 0.008±0.00 | 0.0239±0.00 | 0.0564±0.0 |
|               |                                            |      | 49           | 86          |            | 69           | 88          | 584        | 01         | 78          | 391        |
| 11            | 2,5-dimethylpyrazine                       | 1311 | 0.5754±0.021 | 1.2958±0.05 | 0.4587±0.2 | 1.9477±0.861 | 1.0877±0.24 | 2.7337±0.3 | 0.0364±0.0 | 0.0447±0.02 | 0.1549±0.1 |
|               |                                            |      | 25           | 62          | 101        | 59           | 11          | 003        | 006        | 88          | 081        |
| 12            | Pyrazine, 2-vinyl-6-methyl-                | 1477 | ND           | ND          | ND         | 0.0474±0.000 | 0.0732±0.01 | 0.0414±0.0 | 0.0185±0.0 | ND          | 0.0887±0.0 |
|               |                                            |      |              |             |            | 71           | 72          | 052        | 003        |             | 571        |
| 13            | Pyrazine 2-ethyl-5-methyl-                 | 1379 | ND           | 0.3042±0.00 | 0.1819±0.0 | 0.585±0.1170 | 0.7157±0.16 | 0.695±0.07 | 0.0181±0.0 | 0.049±0.014 | 0.0992±0.0 |
|               |                                            |      |              | 26          | 188        | 6            | 74          | 73         | 004        | 8           | 655        |
| 14            | Pyrazine, 2-ethyl-6-methyl-                | 1373 | 0.2543±0.020 | 0.3509±0.00 | 0.2055±0.0 | 0.6619±0.130 | 0.7842±0.18 | 0.7452±0.0 | 0.007±0.00 | 0.0185±0.00 | 0.0363±0.0 |
|               |                                            |      | 56           | 46          | 189        | 35           | 1           | 793        | 01         | 56          | 234        |
| 15            | Pyrazine, 3-ethyl-2,5-dimethyl-            | 1437 | 0.0947±0.02  | ND          | ND         | ND           | 0.1489±0.03 | 0.1226±0.0 | ND         | ND          | ND         |
|               |                                            |      | 45           |             |            |              | 55          | 141        |            |             |            |
| 16            | Pyrazine, vinyl-                           | 1426 | 0.0119±0.000 | 0.0292±0.00 | 0.0156±0.0 | ND           | ND          | ND         | ND         | ND          | ND         |
|               |                                            |      | 05           | 12          | 023        |              |             |            |            |             |            |
| 17            | Pyrazine, methyl-                          | 1255 | 1.0593±0.071 | 1.2848±0.04 | ND         | 2.3459±0.322 | 2.7727±0.62 | 2.3864±0.2 | 0.0914±0.0 | 0.2237±0.06 | 0.4749±0.3 |
|               |                                            |      | 73           | 58          |            | 88           | 6           | 22         | 037        | 96          | 252        |
| 18            | Pyrazine trimethyl                         | 1394 | ND           | 0.4037±0.00 | ND         | 0.7661±0.06  | ND          | 0.8265±0.0 | ND         | ND          | 0.0729±0.0 |
|               |                                            |      |              | 25          |            | 93           |             | 971        |            |             | 5          |
| Alcohols (16) |                                            |      |              |             |            |              |             |            |            |             |            |
| 19            | 1,6-heptadien-4-ol                         | 1428 | ND           | 0.0435±0.00 | 0.0242±0.0 | ND           | ND          | ND         | ND         | ND          | ND         |
|               |                                            |      |              | 05          | 054        |              |             |            |            |             |            |
| 20            | (S)-(-)-1,2,4-butanetriol                  | 1429 | ND           | ND          | ND         | ND           | ND          | ND         | 0.0006±0   | 0.002±0.000 | ND         |
|               |                                            |      |              |             |            |              |             |            |            | 8           |            |
| 21            | 2-butanol, 3-methyl-                       | 1480 | ND           | 0.0459±0.00 | 0.0198±0.0 | 0.0429±0.020 | 0.0776±0.01 | 0.1992±0.1 | ND         | 0.0005±0.00 | ND         |
|               |                                            |      |              | 94          | 073        | 3            | 75          | 549        |            | 01          |            |
| 22            | 2-propyl-1-pentanol                        | 1207 | ND           | 0.0632±0.01 | 0.0296±0.0 | 0.0928±0.00  | ND          | 0.0711±0.0 | 0.0039±0.0 | ND          | 0.0023±0.0 |
|               |                                            |      |              | 46          | 063        | 79           |             | 077        | 007        |             | 014        |

|                     |                          |      |               |               |               |               |               |               |               |               |               |
|---------------------|--------------------------|------|---------------|---------------|---------------|---------------|---------------|---------------|---------------|---------------|---------------|
| 23                  | 2-thiophene ethanol      | 1905 | 0.0023±0.0001 | 0.004±0.0001  | 0.0024±0.0002 | ND            | 0.0095±0.0023 | 0.0065±0.0007 | 0.0002±0      | 0.0008±0.0002 | 0.0016±0.0001 |
| 24                  | 4-pyridinemethanol       | 1960 | ND            | 0.0009±0.0003 | ND            |
| 25                  | 3-butan-1-ol, 3-methyl-  | 1242 | 0.0277±0.0003 | 0.0392±0.0002 | 0.0214±0.0008 | 0.0549±0.0005 | 0.0616±0.0002 | 0.0559±0.0007 | ND            | ND            | ND            |
| 26                  | 3-pyridinol              | 2333 | ND            | 0.0007±0      | ND            | 0.0049±0.0001 | 0.0022±0.0006 | ND            | ND            | ND            | ND            |
| 27                  | Benzyl alcohol           | 1850 | ND            | ND            | ND            | 0.0039±0.0008 | 0.004±0.0008  | 0.0031±0.0003 | 0.0004±0      | 0.0003±0.0001 | 0.0007±0.0005 |
| 28                  | Linalool                 | 1541 | ND            | ND            | ND            | ND            | ND            | ND            | 0.001±0       | 0.0018±0.0006 | 0.0039±0.0025 |
| 29                  | Tetraethylene glycol     | 2712 | ND            | 0.0011±0.0008 |
| 30                  | Crotyl alcohol           | 1708 | ND            | ND            | 0.008±0.0014  | ND            | ND            | ND            | ND            | ND            | ND            |
| 31                  | Cyclopropylmethanol      | 1952 | ND            | 0.0581±0.0007 | 0.0085±0.0021 | 0.1259±0.0038 | 0.0571±0.0061 | 0.0134±0.0022 | ND            | ND            | ND            |
| 32                  | Ethanol 2,2'-oxydi-      | 1271 | 0.2951±0.0355 | ND            | ND            | 0.5609±0.0609 | ND            | 0.7879±0.0868 | ND            | ND            | ND            |
| 33                  | Furanol                  | 1936 | 0.0065±0.0002 | 0.0082±0.0017 | ND            |
| 34                  | Methyl mercaptan         | 909  | ND            | 0.0007±0      | 0.0002±0      | ND            | ND            | ND            | ND            | ND            | ND            |
| <b>Phenols (12)</b> |                          |      |               |               |               |               |               |               |               |               |               |
| 35                  | 2-methoxy-4-vinylphenol  | 1988 | 0.0074±0.0009 | 0.0139±0.0013 | 0.0056±0.0005 | 0.0264±0.0004 | 0.0239±0.0007 | 0.0181±0.0022 | 0.001±0.0001  | 0.0029±0.0007 | 0.0045±0.0024 |
| 36                  | Maltol                   | 1913 | 0.0149±0.0003 | 0.0591±0.0055 | 0.0264±0.0044 | 0.1252±0.0048 | 0.1607±0.009  | 0.084±0.0039  | 0.0023±0.0001 | 0.0067±0.0019 | 0.0018±0.0011 |
| 37                  | P-cresol                 | 1952 | ND            | ND            | ND            | ND            | ND            | ND            | 0.0003±0      | 0.0014±0.0004 | ND            |
| 38                  | phenol                   | 1926 | 0.0144±0.0002 | 0.0784±0.0024 | 0.0307±0.0026 | 0.1536±0.002  | 0.1177±0.0085 | 0.04±0.0004   | 0.004±0.0001  | 0.028±0.0009  | 0.0929±0.0064 |
| 39                  | 2,3-dimethylphenol       | 1974 | ND            | 0.0003±0.0001 | 0.0434±0.0037 |
| 40                  | Phenol 2-methoxy         | 1833 | 0.0224±0.0001 | 0.1133±0.0068 | 0.0452±0.0047 | 0.2188±0.0023 | 0.1611±0.0094 | 0.0569±0.0065 | 0.0031±0.0001 | 0.0209±0.0067 | 0.0637±0.0048 |
| 41                  | 3,4-dimethylphenol       | 1996 | ND            | 0.0001±0      | 0.0003±0.0002 |
| 42                  | 2-methylphenol           | 1926 | ND            | 0.0093±0.0003 | 0.0043±0.0004 | 0.0174±0.0002 | 0.0158±0.0003 | 0.003±0.0029  | ND            | ND            | ND            |
| 43                  | 3-methylphenol           | 1140 | ND            | ND            | ND            | 0.2875±0.0233 | 0.2927±0.0606 | 0.221±0.0216  | 0.0089±0.0025 | 0.0553±0.0015 | 0.0052±0.0035 |
| 44                  | 4-ethylphenol            | 1982 | 0.0003±0      | 0.0014±0.0001 | 0.0004±0      | 0.0026±0.0004 | ND            | 0.0008±0.0001 | 0.0002±0      | 0.0009±0.0003 | 0.0026±0.0017 |
| 45                  | Phenol 4-ethyl-2-methoxy | 1935 | ND            | 0.0182±0.0013 | 0.0058±0.0005 | 0.0341±0.0006 | 0.0221±0.0006 | 0.0106±0.0013 | 0.0008±0      | 0.0063±0.0002 | 0.0211±0.0013 |
| 46                  | P-tert-butylcatechol     | 2407 | ND            | ND            | ND            | ND            | 0.0001±0      | ND            | ND            | ND            | ND            |
| <b>Furan (17)</b>   |                          |      |               |               |               |               |               |               |               |               |               |
| 47                  | 2,2'-bisfuran            | 1575 | ND            | ND            | ND            | ND            | ND            | ND            | 0.0044±0.0003 | 0.0155±0.0053 | 0.0284±0.0018 |
| 48                  | 2,4-dimethylfuran        | 1001 | ND            | 0.0049±0.0017 | ND            |
| 49                  | 2-vinyl furan            | 1053 | ND            | 0.0535±0.0219 | 0.1118±0.0075 |
| 50                  | 2,3-dihydrobenzofuran    | 2262 | ND            | 0.0004±0      | 0.0002±0      | 0.0008±0.0001 | 0.0008±0.0002 | 0.0007±0.0001 | 0.0014±0.0004 | 0.0003±0.0001 | 0.0006±0.0004 |
| 51                  | Furan                    | 919  | 0.006±0.0005  | 0.0235±0.0063 | 0.0054±0.0002 | 0.0372±0.0004 | 0.0339±0.0074 | 0.0255±0.0046 | 0.0035±0.0002 | 0.0161±0.0057 | 0.0378±0.0028 |

|                                         |                                     |      |               |               |               |               |                |               |               |               |               |
|-----------------------------------------|-------------------------------------|------|---------------|---------------|---------------|---------------|----------------|---------------|---------------|---------------|---------------|
| 52                                      | Furan 2-(2-furylmethyl)-5-methyl-   | 1660 | 0.0116±0.0006 | 0.045±0.0009  | 0.0199±0.0002 | 0.0909±0.0017 | 0.0772±0.0184  | 0.031±0.0034  | 0.0037±0.0001 | 0.0295±0.0096 | 0.0803±0.0515 |
| 53                                      | Furan 2-(2-propenyl)-               | 1071 | ND            | ND            | ND            | ND            | ND             | ND            | ND            | 0.0027±0.001  | 0.0065±0.0048 |
| 54                                      | Furan 2-(methoxymethyl)-            | 1231 | 0.0569±0.0005 | 0.1887±0.0044 | 0.1085±0.0116 | 0.2801±0.0233 | 0.3437±0.0719  | 0.1924±0.0202 | 0.0163±0.001  | 0.0978±0.0271 | 0.1369±0.0586 |
| 55                                      | Furan 2,2'-[oxybis(methylene)] bis- | 1920 | 0.0054±0.0009 | 0.0224±0.0013 | 0.0092±0.0008 | 0.0447±0.0066 | 0.0357±0.0092  | 0.0137±0.0015 | 0.0014±0      | 0.01±0.00031  | 0.0286±0.0184 |
| 56                                      | Furan, 2,2'-methylenebis-           | 1590 | 0.0417±0.0002 | 0.1792±0.0015 | 0.0764±0.0084 | 0.3509±0.068  | 0.2913±0.0717  | 0.1269±0.0148 | ND            | ND            | ND            |
| 57                                      | 2,5-dimethylfuran                   | 963  | 0.0133±0.0006 | 0.0926±0.0116 | 0.0384±0.0061 | 0.1107±0.0068 | 0.1271±0.0254  | 0.0565±0.0064 | 0.0077±0.0032 | 0.0817±0.0247 | 0.1579±0.1054 |
| 58                                      | Furan 2-[[[(methylthio)methyl]-     | 1469 | 0.0422±0.0002 | 0.2997±0.0248 | 0.1452±0.0222 | 0.6168±0.1241 | 0.6167±0.139   | 0.2137±0.0274 | 0.0088±0.0005 | 0.1005±0.021  | 0.1004±0.0616 |
| 59                                      | Furan, 2-ethyl-                     | 980  | 0.0021±0.0001 | 0.0161±0.0004 | 0.006±0.0001  | 0.0132±0.0008 | 0.0147±0.00028 | 0.0071±0.0009 | ND            | ND            | ND            |
| 60                                      | Furan, 2-ethyl-5-methyl-            | 1488 | ND            | ND            | ND            | 1.1139±0.1464 | 0.0124±0.0026  | 0.0111±0.0069 | ND            | ND            | ND            |
| 61                                      | Furan, 2-methyl-                    | 933  | 0.0379±0.0008 | 0.1075±0.0096 | 0.0738±0.0154 | 0.2092±0.0167 | 0.1335±0.027   | 0.1163±0.0157 | 0.0166±0.001  | 0.1044±0.0358 | 0.2538±0.1852 |
| 62                                      | Furan, 2-pentyl                     | 1219 | ND            | ND            | ND            | ND            | ND             | ND            | 0.0035±0.0006 | 0.0119±0.0085 | ND            |
| 63                                      | Furan, 3-phenyl                     | 1828 | ND            | ND            | ND            | ND            | ND             | ND            | 0.0007±0      | 0.0024±0.0008 | 0.0056±0.0033 |
| <b>Sulfur-containing compounds (13)</b> |                                     |      |               |               |               |               |                |               |               |               |               |
| 64                                      | Dihydro-3-(2H)-thiophene            | 1538 | 0.011±0.0003  | 0.0156±0.0017 | 0.0077±0.0011 | ND            | ND             | ND            | ND            | ND            | ND            |
| 65                                      | Dimethyl sulfide                    | 914  | 0.0031±0.0007 | 0.0054±0.0005 | 0.0015±0.0008 | ND            | ND             | ND            | ND            | ND            | ND            |
| 66                                      | Dodecyl sulfate                     | 1138 | ND            | ND            | 0.0106±0.0052 | ND            | ND             | ND            | ND            | ND            | ND            |
| 67                                      | Thiophene, 2-methoxy-5-methyl-      | 1367 | ND            | ND            | 0.0062±0.0035 | ND            | ND             | ND            | ND            | ND            | ND            |
| 68                                      | Thiazole                            | 1239 | ND            | ND            | ND            | 0.026±0.0036  | ND             | ND            | ND            | ND            | ND            |
| 69                                      | Thiazole 2-methyl-                  | 1229 | ND            | ND            | ND            | 0.009±0.0015  | ND             | ND            | ND            | ND            | ND            |
| 70                                      | Thiophene, 2-methoxy-5-methyl-      | 1367 | ND            | ND            | ND            | ND            | ND             | 0.008±0.0003  | ND            | ND            | ND            |
| 71                                      | Carbon disulfide                    | 1720 | ND            | ND            | ND            | ND            | ND             | ND            | 0.0025±0.0004 | 0.0058±0.0013 | 0.0121±0.0082 |
| 72                                      | Dimethyl disulfide                  | 1048 | ND            | ND            | ND            | ND            | ND             | ND            | 0.016±0.0094  | 0.0576±0.0229 | ND            |
| 73                                      | Thiophene                           | 1003 | ND            | ND            | ND            | ND            | ND             | ND            | ND            | 0.0228±0.0072 | 0.0503±0.0357 |
| 74                                      | Thiophene 3-methyl                  | 1092 | ND            | ND            | ND            | ND            | ND             | ND            | ND            | 0.0108±0.0033 | 0.0224±0.0164 |
| 75                                      | Thiophene 2-methyl                  | 1069 | ND            | 0.0704±0.0012 | ND            | 0.0705±0.0059 | 0.0622±0.0123  | 0.0328±0.0033 | 0.0066±0.0013 | 0.0441±0.0196 | 0.1045±0.0752 |
| 76                                      | Phenothiamine                       | 1530 | 0.0027±0.0007 | ND            | ND            | ND            | ND             | ND            | ND            | ND            | ND            |

**Table S2. Identified pyridine, pyrrole, pyrazine, alcohol, phenol, furan, and sulfur-containing compounds in three brands of coffee (CO, PA, ST) under three statuses (bean, powder, and brew) using GC×GC-TOF/MS (µg).**

| No.           | Compounds                              | RI   | Bean          |               |                | Powder        |               |               | Brew          |               |               |
|---------------|----------------------------------------|------|---------------|---------------|----------------|---------------|---------------|---------------|---------------|---------------|---------------|
|               |                                        |      | CO            | PA            | ST             | CO            | PA            | ST            | CO            | PA            | ST            |
| Pyridine (12) |                                        |      |               |               |                |               |               |               |               |               |               |
| 1             | dimethyl pyridine                      | 1218 | 0.0023±0.0008 | 0.0041±0.0016 | ND             | ND            | 0.0167±0.0047 | ND            | ND            | ND            | ND            |
| 2             | Pyridine                               | 1123 | 1.1309±0.1219 | 1.5036±0.1038 | 1.1627±0.1059  | 3.2992±0.0719 | 4.669±0.0185  | 3.373±0.0045  | 0.6374±0.0122 | 0.121±0.0009  | 0.206±0.0038  |
| 3             | Pyridine 2,3-dimethyl                  | 1349 | 0.0004±0.0002 | ND            | 0.0009±0.0002  | ND            | ND            | ND            | ND            | ND            | ND            |
| 4             | Pyridine, 1-acetyl-1,2,3,4-tetrahydro- | 1795 | ND            | ND            | ND             | ND            | 0.0017±0.0004 | 0.0009±0      | ND            | ND            | ND            |
| 5             | Pyridine 2-ethyl-                      | 1251 | 0.0032±0.0001 | 0.0095±0.0009 | ND             | 0.0116±0.0016 | 0.0386±0.0036 | 0.0313±0.0022 | *             | 0.0012±0.0001 | 0.0012±0.0015 |
| 6             | Pyridine 2-ethyl-6-methyl-             | 1274 | ND            | ND            | ND             | 0.0026±0.0005 | 0.0093±0.001  | 0.0072±0.0006 | ND            | ND            | ND            |
| 7             | Pyridine 2-methyl                      | 1177 | 0.0165±0.0075 | 0.0379±0.006  | 0.0144±0.004   | 0.0654±0.0163 | 0.1704±0.0193 | ND            | ND            | 0.0038±0.0005 | ND            |
| 8             | Pyridine, 3-vinyl                      | 1466 | 0.0008±0.0002 | 0.0017±0.0004 | 0.00063±0.0001 | 0.0029±0.0004 | 0.0079±0.0009 | 0.0059±0.0004 | ND            | ND            | 0.0005±0.0006 |
| 9             | 3-ethylpyridine                        | 1364 | 0.0155±0.0042 | 0.0482±0.0086 | ND             | 0.0561±0.0065 | ND            | ND            | 0.0015±0.0004 | 0.0111±0.0011 | 0.0132±0.0016 |
| 10            | 3-methylpyridine                       | 1272 | 0.0113±0.0018 | 0.0346±0.002  | ND             | 0.046±0.0082  | 0.1651±0.0138 | ND            | ND            | 0.0055±0.0003 | ND            |
| 11            | Pyridine 3-propyl                      | 1455 | ND            | ND            | ND             | ND            | 0.0082±0.0008 | 0.009±0.0011  | ND            | ND            | ND            |
| 12            | Pyridine, 4-ethyl-                     | 1381 | ND            | 0.0005±0      | ND             | ND            | 0.002±0.0003  | ND            | ND            | ND            | ND            |
| Pyrrole (8)   |                                        |      |               |               |                |               |               |               |               |               |               |
| 13            | 1H-pyrrole, 1-(2-furanmethyl)-         | 1806 | 0.0808±0.0166 | ND            | ND             | 0.2174±0.0228 | 0.4749±0.0407 | 0.4000±0.000  | 0.0621±0.0127 | 0.1273±0.0158 | 0.1033±0.0046 |
| 14            | 1H-pyrrole, 1-butyl-                   | 1216 | ND            | ND            | ND             | ND            | ND            | ND            | 0.0034±0.0006 | 0.013±0.0011  | 0.0167±0.0014 |
| 15            | 1H-pyrrole, 1-ethyl-                   | 1118 | 0.0096±0.0041 | 0.0149±0.0002 | ND             | 0.0347±0.0049 | 0.0744±0.0066 | ND            | 0.0104±0.0021 | 0.0318±0.0013 | 0.0481±0.0052 |
| 16            | 1H-pyrrole, 1-methyl-                  | 1054 | 0.0463±0.0212 | 0.1264±0.0159 | ND             | 0.1712±0.0396 | 0.4473±0.0419 | ND            | 0.0563±0.0148 | 0.097±0.0058  | ND            |
| 17            | 1H-pyrrole, 2,4-dimethyl-              | 1579 | ND            | 0.0028±0.0006 | 0.0012±0.0004  | 0.006±0.0005  | 0.0996±0.0101 | 0.0804±0.0058 | ND            | ND            | 0.0500±0.0003 |
| 18            | 1H-pyrrole, 2-ethyl-4-methyl-          | 1645 | ND            | ND            | ND             | 0.0106±0.0016 | 0.043±0.004   | 0.0349±0.0025 | ND            | ND            | ND            |
| 19            | 1H-pyrrole, 3-methyl-                  | 1531 | ND            | ND            | ND             | 0.0040±0.0001 | 0.1484±0.0108 | 0.0082±0.001  | ND            | ND            | ND            |
| 20            | Pyrrole                                | 1488 | 0.0463±0.0147 | 0.1084±0.0098 | 0.0369±0.0023  | 0.1795±0.0182 | 0.481±0.0456  | 0.4209±0.0381 | 0.0201±0.0057 | 0.0272±0.0013 | 0.0152±0.0081 |
| Pyrazine (36) |                                        |      |               |               |                |               |               |               |               |               |               |
| 21            | 2,3-diethylpyrazine                    | 1436 | 0.003±0.0008  | 0.0033±0.0007 | ND             | 0.0089±0.0011 | 0.0133±0.0012 | 0.0071±0.0012 | 0.0008±0.0003 | ND            | 0.0005±0.0001 |
| 22            | 2,3-dimethyl-5-ethylpyrazine           | 1445 | 0.0255±0.0074 | 0.0415±0.0032 | ND             | 0.0764±0.0093 | 0.1011±0.0034 | 0.0781±0.0092 | 0.0079±0.002  | 0.0122±0.0019 | 0.0064±0.0005 |
| 23            | 2-acetyl-3-methylpyrazine              | 1681 | 0.0149±0.0043 | 0.0253±0.0037 | ND             | 0.0448±0.0061 | 0.0567±0.0034 | 0.0342±0.0027 | 0.001±0.0004  | 0.0058±0.0006 | 0.0001±0.0002 |
| 24            | 2-butyl-3-methylpyrazine               | 1617 | 0.0007±0.0002 | 0.0009±0.0001 | 0.0002±0.0002  | 0.0025±0.0005 | 0.0034±0.0003 | 0.0025±0.0004 | ND            | ND            | ND            |
| 25            | 2-isopentyl-6-methylpyrazine           | 1610 | 0.0012±0.0003 | 0.0019±0.0001 | ND             | 0.0051±0.0008 | 0.0061±0.0007 | 0.005±0.0009  | ND            | 0.0011±0.0002 | 0.0006±0.0006 |

|    |                                          |      |               |               |               |               |               |               |               |               |               |
|----|------------------------------------------|------|---------------|---------------|---------------|---------------|---------------|---------------|---------------|---------------|---------------|
| 26 | 2-isoamylpyrazine                        | 1566 | 0.0006±0.0002 | 0.0008±0.0001 | 0.0003±0.0001 | 0.0021±0.0004 | ND            | ND            | ND            | ND            | ND            |
| 27 | 2-isobutyl-3-methylpyrazine              | 1472 | 0.0019±0.0006 | 0.0028±0.0003 | 0.0048±0.0006 | 0.0059±0.0008 | ND            | 0.0059±0.0005 | ND            | ND            | ND            |
| 28 | 2-isopropylpyrazine                      | 1326 | 0.0017±0.0005 | ND            | 0.0098±0.0009 | 0.0062±0.0007 | ND            | ND            | ND            | 0.0006±0.0001 | 0.0004±0.0002 |
| 29 | 2-methyl-3-propylpyrazine                | 1462 | ND            | ND            | 0.0019±0.0001 | ND            | ND            | 0.0181±0.0001 | ND            | 0.0019±0.0003 | 0.001±0.0007  |
| 30 | 3H, 4H-pyrrolo[1,2-a]pyrazine            | 1629 | 0.011±0.0014  | 0.0205±0.0011 | ND            | 0.0308±0.0041 | 0.0719±0.0058 | 0.0567±0.0051 | 0.0007±0.0002 | 0.002±0.0002  | 0.0019±0.0001 |
| 31 | 4-methylpyrrolo[1,2-a]pyrazine           | 1986 | ND            | 0.0003±0      | ND            | ND            | 0.0012±0.0002 | 0.0006±0.0001 | ND            | ND            | ND            |
| 32 | Acetylpyrazine                           | 1611 | 0.0226±0.0084 | 0.015±0.0023  | ND            | ND            | 0.0572±0.0183 | ND            | ND            | ND            | ND            |
| 33 | Pyrazine                                 | 1159 | 0.2614±0.1021 | 0.303±0.0658  | 0.1056±0.0699 | 0.7738±0.2447 | 0.9577±0.0957 | 0.762±0.0649  | 0.0822±0.0175 | 0.1034±0.0075 | 0.0953±0.0026 |
| 34 | Pyrazine, (1-methylvinyl)-               | 1583 | 0.0078±0.0002 | 0.0128±0.0009 | 0.0121±0.0004 | 0.0134±0.0018 | 0.0312±0.0022 | 0.0294±0.0018 | ND            | ND            | ND            |
| 35 | Pyrazine, (2-methylpropyl)-              | 1429 | 0.0014±0.0004 | 0.0021±0.0002 | 0.0008±0.0001 | 0.0043±0.0005 | 0.0082±0.0008 | ND            | ND            | ND            | ND            |
| 36 | Pyrazine 2-(n-propyl)-                   | 1397 | 0.0178±0.0043 | 0.0336±0.0026 | ND            | 0.0576±0.0063 | 0.132±0.0102  | 0.1055±0.0075 | ND            | ND            | 0.0645±0.0036 |
| 37 | 2,3-dimethylpyrazine                     | 1323 | 0.341±0.0688  | 0.2359±0.0207 | ND            | 0.5679±0.0546 | ND            | 0.7576±0.165  | ND            | 0.0524±0.0053 | ND            |
| 38 | Pyrazine, 2,5-diethyl-                   | 1440 | ND            | 0.0044±0.0006 | ND            | ND            | 0.0156±0.0059 | ND            | ND            | 0.0014±0.0002 | ND            |
| 39 | 2,5-dimethylpyrazine                     | 1297 | 0.9326±0.1033 | 0.9367±0.1396 | ND            | ND            | ND            | 0.0027±0.0001 | 0.0833±0.0088 | 0.1147±0.0202 | ND            |
| 40 | Pyrazine, 2,6-diethyl-                   | 1416 | 0.0176±0.0005 | 0.0215±0.0018 | ND            | 0.0628±0.0072 | 0.0911±0.0079 | 0.0512±0.0039 | 0.0044±0.0011 | 0.0074±0.0012 | 0.0036±0.0002 |
| 41 | 2,6-dimethylpyrazine                     | 1302 | 0.5018±0.142  | ND            | ND            | ND            | ND            | 0.288±0.0713  | 0.2694±0.0945 | ND            | 0.1680±0.0394 |
| 42 | Pyrazine, 2-butyl-3,5-dimethyl-          | 1649 | ND            | ND            | 0.0174±0.0015 | 0.054±0.0058  | 0.0936±0.0007 | 0.0451±0.0053 | ND            | ND            | ND            |
| 43 | Pyrazine 2-ethyl-5-methyl-               | 1369 | 0.0536±0.0113 | 0.0535±0.0089 | ND            | 0.0054±0.0005 | 0.1876±0.0156 | ND            | 0.0438±0.0093 | 0.0416±0.0062 | 0.0309±0.0025 |
| 44 | Pyrazine, 2-ethyl-6-methyl-              | 1363 | 0.0625±0.0051 | 0.0869±0.0151 | ND            | 0.3136±0.1049 | ND            | 0.2444±0.081  | 0.0494±0.0198 | 0.0784±0.0303 | 0.0502±0.0067 |
| 45 | Pyrazine 2-methoxy-3-(2-methylpropyl)-   | 1508 | 0.003±0.0005  | 0.0038±0.0003 | ND            | 0.0092±0.0011 | 0.0141±0.0012 | 0.0079±0.0007 | 0.0023±0.0005 | 0.0033±0.0003 | 0.0018±0.0006 |
| 46 | Pyrazine, 2-methyl-6-(1-propenyl)-, (E)- | 1643 | ND            | ND            | ND            | ND            | 0.0076±0.0006 | ND            | ND            | ND            | ND            |
| 47 | Pyrazine, 2-methyl-5-(1-propenyl)-, (Z)- | 1649 | 0.0008±0.0002 | 0.0009±0.0001 | ND            |
| 48 | Pyrazine, 2-methyl-5-propyl-             | 1460 | 0.004±0.0012  | 0.0005±0.0001 | ND            | 0.0233±0.003  | 0.032±0.0029  | 0.0198±0.0018 | ND            | ND            | ND            |
| 49 | Pyrazine 3,5-diethyl-2-methyl-           | 1479 | 0.0076±0.0023 | 0.008±0.0015  | ND            | ND            | ND            | 0.0005±0.0001 | ND            | ND            | ND            |
| 50 | Pyrazine, 3-ethyl-2,5-dimethyl-          | 1428 | ND            | 0.0318±0.0029 | ND            | 0.1187±0.0675 | 0.1137±0.006  | 0.0682±0.0076 | 0.02±0.0042   | 0.0299±0.0048 | 0.0146±0.0015 |
| 51 | Pyrazine, vinyl-                         | 1419 | 0.017±0.0047  | 0.0237±0.0016 | ND            | 0.0601±0.008  | 0.1002±0.0079 | 0.0559±0.003  | 0.0026±0.0006 | 0.0047±0.0004 | 0.0027±0.0002 |
| 52 | Pyrazine, ethyl-                         | 1306 | ND            | 0.1466±0.0074 | ND            | 0.0049±0.0017 | ND            | 0.3892±0.0515 | ND            | ND            | ND            |
| 53 | Pyrazine, methyl-                        | 1228 | 0.4215±0.0963 | 0.9261±0.116  | ND            | 0.7254±0.0698 | 0.0015±0.0001 | 0.3209±0.0324 | 0.3991±0.0828 | 0.4326±0.0347 | ND            |
| 54 | Pyrazine tetramethyl                     | 1462 | 0.0030±0.0008 | 0.0042±0.0004 | 0.0012±0.0001 | 0.0089±0.0012 | ND            | 0.0105±0.0004 | ND            | ND            | ND            |

|                      |                                                        |      |               |               |                |               |               |               |               |               |               |
|----------------------|--------------------------------------------------------|------|---------------|---------------|----------------|---------------|---------------|---------------|---------------|---------------|---------------|
| 55                   | Pyrazine trimethyl                                     | 1399 | ND            | 0.0019±0.0002 | ND             | ND            | 0.358±0.0183  | 0.0014±0.0004 | ND            | ND            | ND            |
| 56                   | Pyrrolo[1,2-a]pyrazine                                 | 1982 | ND            | 0.0005±0      | ND             | ND            | ND            | 0.0015±0.0001 | ND            | ND            | ND            |
| <b>Alcohols (66)</b> |                                                        |      |               |               |                |               |               |               |               |               |               |
| 57                   | 1,2-butanediol                                         | 1662 | ND            | 0.0006±0.0001 | ND             | ND            | ND            | ND            | ND            | ND            | ND            |
| 58                   | E)-1,3-butadien-1-ol                                   | 1228 | ND            | ND            | ND             | 0.0043±0.0004 | ND            | ND            | ND            | ND            | ND            |
| 59                   | 1,3-propanediol                                        | 1569 | 0.0026±0.0005 | 0.0032±0.0003 | 0.00108±0.0004 | 0.006±0.0005  | 0.0092±0.0013 | 0.0059±0.0005 | ND            | ND            | ND            |
| 60                   | 1,4-benzenediol, 2,6-dimethyl-                         | 2866 | ND            | ND            | ND             | ND            | ND            | ND            | ND            | ND            | 0.0003±0.0008 |
| 61                   | 1,6-heptadien-4-ol                                     | 1519 | ND            | ND            | ND             | 0.0017±0.0003 | 0.0303±0.0022 | 0.0309±0.0055 | ND            | ND            | 0.0022±0.0006 |
| 62                   | 1-butanol                                              | 1057 | ND            | 0.0009±0      | ND             | ND            | ND            | ND            | 0.0006±0.0002 | 0.0005±0.0001 | 0.0006±0.0002 |
| 63                   | 1-butanol, 3-methyl-                                   | 1150 | ND            | ND            | 0.0042±0.0001  | 0.029±0.0039  | 0.0503±0.0042 | ND            | 0.0086±0.0022 | ND            | ND            |
| 64                   | 1-hexanol                                              | 1326 | 0.0115±0.0022 | 0.0093±0.0022 | ND             | 0.039±0.0042  | 0.0372±0.0036 | 0.031±0.0026  | 0.0054±0.0012 | 0.0054±0.0004 | 0.0034±0.0005 |
| 65                   | 1-octyl-3-ol                                           | 1431 | 0.0085±0.0012 | 0.0122±0.0008 | 0.0322±0.0086  | 0.0251±0.0029 | 0.0463±0.0048 | 0.0274±0.0021 | 0.0054±0.0013 | 0.008±0.0009  | 0.0044±0.0001 |
| 66                   | 1-pentanol                                             | 1208 | 0.0008±0.0001 | 0.0008±0.0001 | 0.0026±0.0003  | 0.0024±0.0002 | 0.0029±0.0006 | 0.0021±0.0002 | ND            | 0.0004±0      | ND            |
| 67                   | 1-penten-3-ol                                          | 1318 | 0.0075±0.0021 | 0.0136±0.0014 | ND             | ND            | ND            | ND            | ND            | ND            | ND            |
| 68                   | 1-propanol                                             | 819  | ND            | ND            | ND             | ND            | ND            | 0.0011±0      | ND            | ND            | ND            |
| 69                   | 1-propanol, 2-methyl-                                  | 957  | 0.0016±0.0006 | 0.0027±0.0002 | 0.0086±0.0002  | 0.0053±0.0016 | 0.0106±0.0011 | 0.0059±0.0004 | ND            | ND            | ND            |
| 70                   | 2,3-butanediol                                         | 1519 | ND            | 0.1114±0.0098 | 0.0017±0.0005  | ND            | 0.2736±0.0285 | ND            | ND            | ND            | ND            |
| 71                   | 2,3-Butanediol, [S-(R*, R*)]-                          | 1557 | 0.1357±0.0289 | 0.1592±0.0202 | ND             | 0.3644±0.0283 | 0.4557±0.0335 | ND            | ND            | ND            | ND            |
| 72                   | 2-butan-1-ol, 3-methyl-acetic acid                     | 1214 | 0.0088±0.0038 | ND            | 0.0268±0.0014  | 0.0052±0.0006 | 0.0472±0.0005 | 0.0321±0.0016 | 0.0080±0.0011 | 0.0122±0.0001 | 0.0070±0.0002 |
| 73                   | 2-furan methanol                                       | 1637 | 0.5022±0.1857 | ND            | ND             | ND            | ND            | ND            | 0.4542±0.0713 | 0.2792±0.0518 | 0.2274±0.0317 |
| 74                   | 2-furanmethanol, 5-vinyltetrahydro-β5-trimethyl-, cis- | 1424 | ND            | ND            | ND             | ND            | ND            | ND            | 0.0052±0.0012 | ND            | 0.0042±0.0005 |
| 75                   | 2-furanmethanol, 5-methyl-                             | 1700 | 0.0033±0.0006 | 0.002±0.0001  | ND             | 0.0088±0.0001 | 0.0068±0.0006 | 0.0034±0.0003 | 0.0004±0.0001 | 0.0009±0.0003 | ND            |
| 76                   | 2-furan methanol, acetate                              | 1516 | 0.2117±0.0396 | ND            | 0.0091±0.0023  | 0.5219±0.0562 | 0.1594±0.0433 | 0.1634±0.0087 | 0.0019±0.0005 | ND            | 0.0013±0.0003 |
| 77                   | 2-furanol, tetrahydro-                                 | 1463 | ND            | ND            | ND             | 0.003±0.0003  | 0.01±0.0003   | 0.0012±0.0001 | ND            | ND            | ND            |
| 78                   | 2-furanol, tetrahydro-2-methyl-                        | 1476 | ND            | 0.0003±0      | 0.0191±0.0032  | ND            | ND            | ND            | ND            | ND            | ND            |
| 79                   | 2-furfuryl mercaptan                                   | 1407 | 0.003±0.0006  | 0.0026±0.0029 | 0.0005±0.0001  | 0.013±0.0006  | 0.0126±0.0029 | 0.0015±0.0001 | ND            | ND            | ND            |
| 80                   | 2-heptanol (S)-                                        | 1291 | 0.0104±0.0015 | 0.0192±0.0018 | ND             | 0.0292±0.0022 | 0.0741±0.0069 | 0.0557±0.0101 | ND            | 0.0165±0.0013 | 0.0099±0.0002 |
| 81                   | 2-Hexanol (S)-                                         | 1169 | ND            | ND            | 0.0003±0.0001  | ND            | 0.0044±0.0002 | ND            | ND            | 0.001±0.0001  | ND            |
| 82                   | 2-hex-1-ol                                             | 1663 | ND            | 0.0005±0.0003 | ND             | ND            | 0.0017±0.0006 | ND            | ND            | ND            | ND            |

|     |                                          |      |               |               |               |               |               |               |               |               |               |
|-----|------------------------------------------|------|---------------|---------------|---------------|---------------|---------------|---------------|---------------|---------------|---------------|
| 83  | 2H-pyran-2-methanol, tetrahydro-         | 1458 | 0.0006±0.0001 | 0.0023±0.0002 | 0.0007±0.0001 | 0.0017±0.0002 | 0.0088±0.0009 | 0.0062±0.0005 | ND            | ND            | ND            |
| 84  | 2-methyl-5-hexene-3-ol                   | 1222 | 0.0011±0.0003 | 0.0008±0.0001 | ND            | 0.0098±0.0012 | ND            | ND            | ND            | ND            | ND            |
| 85  | 2-propanol 1-(2-methoxy-1-methylethoxy)- | 1458 | 0.0011±0.0002 | ND            | ND            | ND            | 0.0028±0.0004 | 0.0152±0.0035 | ND            | ND            | ND            |
| 86  | 2-propanol, 1-methoxy                    | 1033 | ND            | 0.001±0.0002  | ND            | 0.0036±0.0008 | 0.0121±0.0013 | 0.0089±0.001  | ND            | ND            | ND            |
| 87  | 2-propan-1-ol                            | 1006 | 0.0005±0.0002 | 0.0014±0.0001 | 0.0003±0.0001 | 0.0031±0.0004 | 0.0191±0.0016 | ND            | ND            | ND            | ND            |
| 88  | 2-propanol, 2-methyl-                    | 1135 | ND            | ND            | ND            | ND            | ND            | ND            | 0.0016±0.0003 | 0.0017±0.0001 | ND            |
| 89  | 2-thiophene ethanol                      | 1916 | 0.0055±0.001  | 0.0088±0.0005 | ND            |
| 90  | 3-butan-2-ol, 2-methyl-                  | 1632 | ND            | ND            | ND            | 0.0301±0.0085 | 0.0282±0.0037 | 0.0121±0.0006 | 0.0071±0.0027 | 0.0081±0.0004 | 0.0056±0.0003 |
| 91  | 3-butan-1-ol, 3-methyl-                  | 1204 | ND            | 0.0213±0.0016 | 0.0062±0.0005 | ND            | ND            | ND            | 0.0019±0.0003 | 0.0012±0      | ND            |
| 92  | 3-mercapto-3-methylbutanol               | 1641 | 0.0049±0.0008 | 0.0105±0.0027 | ND            | 0.0403±0.0017 | ND            | 0.0608±0.0036 | ND            | ND            | ND            |
| 93  | 3-methyl-2-pyrazinyl methanol            | 1890 | ND            | 0.0003±0      | ND            | 0.0013±0.0004 | 0.0009±0.0001 | ND            | ND            | ND            | ND            |
| 94  | 3-methyl-3-butene-1-thiol                | 665  | ND            | 0.0007±0.0001 | 0.0004±0.0001 | ND            | 0.0022±0.0002 | ND            | ND            | ND            | ND            |
| 95  | 3-octanol                                | 1373 | ND            | 0.0025±0.0002 | ND            | 0.0033±0.0004 | 0.0096±0.001  | 0.0049±0.0006 | ND            | 0.0012±0.0001 | 0.0057±0.0005 |
| 96  | 3-thiophene ethanol                      | 1916 | ND            | 0.0013±0.0001 | ND            |
| 97  | 4-penten-1-ol                            | 1081 | ND            | 0.0091±0.0026 | ND            | ND            | ND            | ND            | ND            | 0.0148±0.0007 | ND            |
| 98  | 3-pentanol                               | 998  | ND            | ND            | ND            | ND            | 0.0039±0.0005 | 0.0023±0.0002 | ND            | ND            | ND            |
| 99  | 3-pentanol, 2-methyl-                    | 1314 | ND            | ND            | ND            | 0.4633±0.053  | ND            | 0.3028±0.0263 | ND            | ND            | ND            |
| 100 | 3-pyridinol                              | 2381 | ND            | ND            | ND            | ND            | 0.017±0.0024  | ND            | ND            | ND            | ND            |
| 101 | 4-penten-2-ol, 4-methyl-                 | 1125 | ND            | ND            | ND            | ND            | 0.0043±0.0005 | 0.0037±0.0004 | ND            | 0.0005±0      | ND            |
| 102 | 4-pyridinemethanol                       | 2077 | ND            | ND            | ND            | ND            | 0.0125±0.0009 | ND            | ND            | ND            | ND            |
| 103 | 5-hexene-2-ol, 5-methyl-                 | 1354 | ND            | ND            | ND            | ND            | 0.0019±0.0003 | ND            | ND            | ND            | ND            |
| 104 | 4-penten-2-ol, 3-methyl-                 | 1125 | 0.0004±0.0001 | 0.0013±0.0001 | ND            |
| 105 | Benzyl alcohol                           | 1852 | 0.0014±0.0002 | 0.002±0.0002  | ND            | 0.003±0.0004  | 0.0056±0.001  | 0.0012±0.0001 | 0.0006±0.0004 | 0.0007±0.0001 | 0.0004±0.0002 |
| 106 | Bicyclo[2.2.1]hept-5-en-2-ol             | 1514 | ND            | 0.0004±0      | ND            | ND            | 0.0071±0.0007 | 0.0039±0.0003 | ND            | ND            | ND            |
| 107 | Bicyclo[2.2.2]octan-1-ol, 4-methyl-      | 1650 | ND            | ND            | ND            | ND            | 0.0058±0.0006 | 0.0043±0.0004 | ND            | ND            | ND            |
| 108 | Ethanol                                  | 405  | ND            | 0.0106±0.0054 | ND            | 0.0353±0.0121 | 0.043±0.0041  | 0.028±0.0033  | ND            | ND            | ND            |
| 109 | Cyclopropylmethanol                      | 2060 | ND            | 0.0005±0.0002 |
| 110 | DL-2,3-butanediol                        | 1026 | ND            | 0.0008±0      | ND            |
| 111 | Ethanol 2-(vinyl-oxo)-                   | 2925 | ND            | 0.1295±0.0126 | ND            |

|                     |                                                             |      |               |               |               |               |               |               |               |               |               |
|---------------------|-------------------------------------------------------------|------|---------------|---------------|---------------|---------------|---------------|---------------|---------------|---------------|---------------|
| 112                 | Ethanol 2,2'-oxydi-                                         | 2983 | ND            | 0.0137±0.0014 | ND            | ND            | ND            | ND            | ND            | 0.0182±0.0005 | ND            |
| 113                 | Isopropanol                                                 | 1047 | ND            | ND            | ND            | 0.001±0.0004  | 0.0016±0.0002 | ND            | ND            | ND            | ND            |
| 114                 | Furfuryl alcohol, tetrahydro-5-methyl-, cis-                | 1437 | ND            | ND            | 0.0005±0.0001 | ND            | ND            | ND            | ND            | ND            | ND            |
| 115                 | Linalool                                                    | 1531 | 0.0072±0.0001 | 0.0055±0.0004 | ND            | 0.0199±0.0022 | 0.0185±0.0024 | 0.0089±0.0028 | 0.0049±0.0011 | 0.0041±0.0005 | 0.0021±0.0002 |
| 116                 | Methyl mercaptan                                            | 621  | 0.0004±0.0002 | 0.0005±0.0001 | ND            | ND            | ND            | ND            | 0.0004±0.0001 | ND            | 0.0003±0.0006 |
| 117                 | Phenethyl alcohol                                           | 1887 | 0.0045±0.0009 | 0.0068±0.0006 | 0.0017±0.0001 | 0.0114±0.0016 | 0.0212±0.0015 | 0.0147±0.0021 | 0.0012±0.0004 | 0.0020±0.0001 | 0.0014±0.0009 |
| 118                 | Isopentenol                                                 | 1291 | 0.0205±0.0059 | 0.014±0.009   | 0.0308±0.0037 | 0.0602±0.0062 | 0.0503±0.0061 | 0.0264±0.0038 | 0.0066±0.0015 | 0.0044±0.0003 | 0.0026±0.0005 |
| 119                 | Propylene glycol                                            | 1571 | ND            | 0.0262±0.0039 | 0.0589±0.0060 | 0.0579±0.0063 | 0.0927±0.0092 | ND            | ND            | ND            | ND            |
| 120                 | Terpineol                                                   | 1682 | 0.002±0.0003  | 0.0016±0.0001 | ND            | ND            | ND            | ND            | 0.0013±0.0003 | 0.0014±0.0002 | ND            |
| 121                 | Trans-oxyllinalool                                          | 1455 | 0.0152±0.0033 | ND            | ND            | 0.0472±0.0056 | 0.0751±0.0057 | 0.0507±0.0047 | ND            | 0.0046±0.0005 | 0.0025±0.0003 |
| 122                 | Triethylene glycol                                          | 2722 | ND            | ND            | 0.0004±0.0001 | ND            | ND            | ND            | 0.0006±0.0003 | ND            | ND            |
| <b>Phenols (15)</b> |                                                             |      |               |               |               |               |               |               |               |               |               |
| 123                 | 2-allylphenol                                               | 1706 | 0.0007±0.0001 | 0.002±0.0002  | 0.0007±0.0003 | 0.0018±0.0002 | ND            | 0.0055±0.0005 | ND            | 0.0023±0.0002 | 0.0019±0.0004 |
| 124                 | 2-methoxy-4-vinylphenol                                     | 2168 | 0.0056±0.0018 | 0.0079±0.0008 | ND            | 0.0188±0.0034 | 0.0292±0.0019 | 0.0199±0.0049 | 0.0033±0.0012 | 0.0028±0.0005 | 0.0038±0.0005 |
| 125                 | Isomalt                                                     | 1597 | 0.0068±0.0002 | 0.0059±0.0001 | ND            | 0.0232±0.0023 | 0.0247±0.0032 | 0.0178±0.0033 | ND            | ND            | ND            |
| 126                 | Maltol                                                      | 1942 | 0.0225±0.0007 | 0.0582±0.0011 | ND            | 0.1071±0.0018 | 0.1731±0.0036 | 0.1075±0.0057 | ND            | ND            | ND            |
| 127                 | P-cresol                                                    | 2052 | 0.0003±0      | 0.0007±0.0001 | 0.0002±0.0001 | 0.0008±0.0001 | 0.0022±0.0002 | 0.0015±0.0002 | ND            | ND            | ND            |
| 128                 | phenol                                                      | 2004 | 0.0212±0.0039 | 0.0624±0.0057 | 0.0213±0.0022 | 0.0583±0.0072 | 0.2006±0.0016 | 0.1539±0.0014 | 0.0154±0.0033 | 0.055±0.0037  | 0.0507±0.0044 |
| 129                 | 2,3-dimethylphenol                                          | 2118 | ND            | 0.0005±0.0001 | 0.0034±0.0004 |
| 130                 | 2,4-dimethylphenol                                          | 2052 | ND            | 0.0005±0.0001 | ND            |
| 131                 | 2-ethylphenol                                               | 2042 | ND            | 0.0003±0.0001 | ND            |
| 132                 | Phenol 2-methoxy                                            | 1837 | 0.0328±0.0062 | 0.1101±0.0102 | ND            | 0.0826±0.0098 | ND            | ND            | 0.0117±0.0025 | 0.0466±0.0063 | 0.0354±0.0043 |
| 133                 | 2-methylphenol                                              | 1976 | 0.0022±0.0004 | 0.0065±0.0006 | 0.0018±0.0002 | 0.0057±0.0006 | 0.0205±0.0016 | 0.0135±0.0016 | 0.0021±0.0004 | 0.0078±0.0001 | ND            |
| 134                 | 3-(1-methylethyl)-phenol                                    | 1301 | ND            | ND            | ND            | 0.0007±0.0001 | ND            | ND            | ND            | ND            | ND            |
| 135                 | 3-methylphenol                                              | 2060 | 0.0013±0.0003 | ND            | ND            | ND            | ND            | 0.0054±0.0006 | ND            | ND            | ND            |
| 136                 | 4-ethylphenol                                               | 1167 | 0.002±0.0008  | 0.0047±0.0006 | ND            | 0.0097±0.0009 | 0.0189±0.002  | 0.0142±0.0015 | 0.0003±0.0001 | 0.0033±0.0006 | 0.0012±0.0020 |
| 137                 | Phenol 4-ethyl-2-methoxy                                    | 2004 | 0.0032±0.0004 | 0.0097±0.0001 | 0.0036±0.0001 | 0.0079±0.0012 | 0.0331±0.0022 | 0.0353±0.0063 | 0.0021±0.0004 | 0.0100±0.0015 | 0.0924±0.0011 |
| <b>Furan (38)</b>   |                                                             |      |               |               |               |               |               |               |               |               |               |
| 138                 | (2R, 5R)-2-methyl-5-(prop-1-en-2-yl)-2-vinyltetrahydrofuran | 1160 | 0.0025±0.0008 | 0.0045±0.0004 | ND            | 0.0111±0.0009 | 0.019±0.0016  | 0.0133±0.0011 | 0.0033±0.0004 | 0.0076±0.0007 | ND            |



|     |                                                             |      |               |               |               |               |               |               |               |               |               |
|-----|-------------------------------------------------------------|------|---------------|---------------|---------------|---------------|---------------|---------------|---------------|---------------|---------------|
| 139 | (2R, 5S)-2-methyl-5-(prop-1-en-2-yl)-2-vinyltetrahydrofuran | 1203 | ND            | ND            | ND            | ND            | 0.0149±0.0015 | ND            | ND            | 0.0051±0.0004 | 0.0029±0.0002 |
| 140 | 2,2'-bisfuran                                               | 1588 | 0.0026±0.0006 | 0.0194±0.0014 | 0.0027±0.0003 | 0.0511±0.0065 | 0.0801±0.0056 | 0.0117±0.0006 | 0.011±0.0021  | 0.0194±0.0007 | 0.0443±0.0020 |
| 141 | 2,4-dimethylfuran                                           | 749  | 0.0013±0.0007 | 0.0042±0.0005 | 0.0023±0.0004 | 0.0043±0.0012 | 0.0142±0.0016 | 0.0196±0.0015 | 0.0017±0.0012 | 0.0034±0.0002 | 0.0072±0.0005 |
| 142 | 2-acetyl-5-methylfuran                                      | 1454 | ND            | ND            | ND            | 0.4931±0.0611 | 0.2354±0.0204 | 0.5501±0.1324 | 0.0261±0.006  | 0.0433±0.0043 | 0.0268±0.011  |
| 143 | 2-methoxytetrahydrofuran                                    | 767  | 0.0014±0.0005 | 0.0021±0.0001 | ND            | 0.0035±0.001  | 0.0063±0.0006 | 0.0036±0.0001 | ND            | ND            | ND            |
| 144 | 2-methyl-5-[(methylthio)methyl]furan                        | 1531 | ND            | ND            | ND            | ND            | ND            | ND            | 0.0013±0.0003 | ND            | 0.0023±0.0005 |
| 145 | 2-n-butylfuran                                              | 1044 | ND            | ND            | ND            | 0.0014±0.0001 | 0.0383±0.0022 | ND            | ND            | ND            | ND            |
| 146 | 2-vinyl furan                                               | 929  | ND            | 0.0942±0.01   | 0.0355±0.0030 | 0.1588±0.0332 | 0.305±0.0297  | ND            | ND            | 0.1164±0.0105 | 0.1092±0.008  |
| 147 | 3-acetyl-2,5-dimethylfuran                                  | 1512 | 0.0038±0.0009 | 0.0051±0.0004 | 0.0082±0.0007 | ND            | ND            | ND            | ND            | 0.0041±0.0004 | 0.0016±0.0007 |
| 148 | 2,3-dihydrobenzofuran                                       | 1571 | 0.0053±0.001  | 0.0146±0.0013 | 0.0054±0.0005 | 0.0148±0.0017 | 0.0543±0.0047 | 0.045±0.0027  | ND            | 0.0186±0.0016 | 0.0154±0.002  |
| 149 | 2-methylbenzofuran                                          | 1576 | 0.0034±0.0006 | 0.0071±0.0005 | 0.0018±0.0001 | 0.0096±0.0012 | 0.028±0.0021  | 0.0183±0.0008 | 0.003±0.002   | 0.0089±0.0008 | 0.0060±0.0003 |
| 150 | 4,7-dimethylbenzofuran                                      | 1688 | ND            | ND            | ND            | 0.0012±0.0002 | 0.0062±0.0006 | 0.0036±0.0002 | ND            | ND            | ND            |
| 151 | Ethyl-2-benzofuran                                          | 1658 | ND            | 0.0002±0      | ND            | ND            | 0.0008±0.0001 | 0.0012±0.0001 | ND            | ND            | ND            |
| 152 | Furan                                                       | 748  | 0.0099±0.0058 | 0.034±0.0019  | ND            | ND            | 0.2526±0.028  | 0.1525±0.0094 | 0.0628±0.0108 | 0.0846±0.0082 | 0.0783±0.0063 |
| 153 | Furan 2-(1,1-dimethylethyl)-4-methyl-                       | 1980 | ND            | ND            | ND            | 0.0011±0.0002 | 0.0195±0.0021 | ND            | ND            | ND            | ND            |
| 154 | Furan 2-(2-furylmethyl)-5-methyl-                           | 1659 | 0.01±0.0022   | 0.0347±0.003  | 0.0085±0.0027 | 0.0283±0.0033 | ND            | ND            | 0.0079±0.0014 | 0.039±0.0039  | 0.0307±0.0013 |
| 155 | Furan 2-(methoxymethyl)-                                    | 1191 | 0.1009±0.0297 | 0.0008±0.0001 | 0.0010±0.0002 | ND            | ND            | ND            | 0.0921±0.0162 | 0.1992±0.0117 | 0.1136±0.0019 |
| 156 | Furan 2-(2-propenyl)-                                       | 970  | ND            | ND            | ND            | 0.1041±0.0131 | 0.275±0.0236  | 0.1957±0.0094 | 0.0055±0.0024 | 0.0803±0.0243 | 0.0039±0.0005 |
| 157 | Furan 2,2'-[oxybis(methylene)]bis-                          | 1960 | 0.0166±0.0036 | 0.0308±0.0023 | ND            | 0.0245±0.0026 | 0.0899±0.0053 | 0.0615±0.0028 | ND            | ND            | ND            |
| 158 | Furan, 2,2'-methylenebis[5-methyl-                          | 1732 | 0.0008±0.0002 | 0.0022±0.0002 | ND            | ND            | ND            | ND            | ND            | 0.0022±0.0002 | 0.0016±0.0001 |
| 159 | Furan, 2,2'-methylenebis-                                   | 1616 | ND            | ND            | ND            | 0.1727±0.0184 | 0.1565±0.0132 | 0.0151±0.0006 | ND            | ND            | ND            |
| 160 | 2,3,5-trimethylfuran                                        | 881  | ND            | ND            | ND            | 0.0071±0.0008 | 0.0143±0.0011 | 0.0051±0.0006 | ND            | 0.0083±0.0005 | 0.0071±0.0011 |
| 161 | 2,3-dihydrofuran                                            | 234  | 0.0011±0.0001 | 0.0013±0.0001 | ND            | ND            | ND            | 0.0025±0.0004 | ND            | ND            | ND            |
| 162 | Furan, 2,3-dihydro-5-methyl-                                | 355  | 0.0086±0.0001 | 0.008±0.0008  | ND            | 0.0158±0.0017 | 0.0213±0.0018 | 0.0137±0.0016 | ND            | ND            | ND            |
| 163 | Furan, 2,5-diethyltetrahydro-                               | 852  | ND            | ND            | ND            | 0.002±0.0002  | 0.0039±0.0004 | 0.0009±0.0001 | ND            | ND            | ND            |
| 164 | 2,5-dimethylfuran                                           | 975  | ND            | 0.0684±0.0123 | 0.0283±0.0028 | 0.1011±0.0077 | 0.2397±0.0325 | 0.1881±0.0186 | ND            | 0.1091±0.0079 | 0.0985±0.0079 |
| 165 | Furan 2-[[[(methylthio)methyl]-                             | 1782 | 0.005±0.0011  | 0.0076±0.0007 | 0.0022±0.0001 | 0.0132±0.0016 | 0.0271±0.0019 | 0.0187±0.0019 | 0.0048±0.0009 | 0.0098±0.0009 | 0.0074±0.0003 |
| 166 | Furan, 2-ethyl-5-methyl-                                    | 851  | ND            | ND            | ND            | 0.0004±0      | 0.0449±0.0036 | 0.0374±0.0033 | ND            | 0.0185±0.0018 | 0.0162±0.0018 |

|                                             |                                           |      |                   |                   |                    |                   |                   |                   |                   |                   |                   |
|---------------------------------------------|-------------------------------------------|------|-------------------|-------------------|--------------------|-------------------|-------------------|-------------------|-------------------|-------------------|-------------------|
| 167                                         | Furan 2-<br>[[[(methylthio)methyl]-       | 1463 | 0.0678±0.<br>0282 | ND                | 0.0431±0.0<br>268  | ND                | ND                | ND                | 0.0374±0.<br>0117 | 0.0471±0.<br>0061 | 0.1810±0.0<br>139 |
| 168                                         | Furan, 2-methyl-                          | 868  | 0.0772±0.<br>0102 | 0.1958±0.<br>0237 | ND                 | 0.2646±0.<br>0247 | 0.5963±0.<br>1279 | 0.5593±0.<br>0537 | ND                | 0.3734±0.<br>0238 | 0.3503±0.0<br>083 |
| 169                                         | Furan, 2-methyl-5-<br>(methylthio)-       | 1354 | 0.0017±0.<br>0005 | 0.0039±0.<br>0004 | 0.0013±0.0<br>001  | 0.0041±0.<br>0004 | 0.0158±0.<br>0016 | 0.0125±0.<br>0009 | 0.0014±0.<br>0002 | 0.005±0.0<br>004  | 0.0043±0.0<br>08  |
| 170                                         | Furan, 2-pentyl                           | 1184 | 0.0144±0.<br>0031 | 0.02±0.00<br>23   | ND                 | 0.0583±0.<br>005  | 0.0842±0.<br>0081 | 0.0663±0.<br>0044 | ND                | 0.0085±0.<br>0008 | 0.0012±0.0<br>014 |
| 171                                         | Furan, 2-propyl-                          | 811  | ND                | ND                | ND                 | ND                | ND                | 0.0115±0.<br>0015 | ND                | 0.0049±0.<br>0005 | ND                |
| 172                                         | Furan, 3-phenyl                           | 1833 | ND                | ND                | ND                 | ND                | ND                | ND                | 0.0011±0.<br>0002 | 0.002±0.0<br>002  | ND                |
| 173                                         | Furan, tetrahydro-2-methyl-               | 1368 | ND                | 0.0643±0.<br>0069 | 0.0003±0.0<br>001  | 0.0011±0.<br>0005 | 0.0069±0.<br>0004 | 0.0051±0.<br>0003 | ND                | 0.0012±0          | 0.0009±0.0<br>001 |
| 174                                         | Furan-2-carbonyl chloride,<br>tetrahydro- | 1330 | ND                | 0.1679±0.<br>0183 | ND                 | 0.0083±0.<br>0019 | 0.6374±0.<br>0815 | 0.041±0.0<br>03   | ND                | ND                | ND                |
| 175                                         | Tetrahydrofuran                           | 869  | 0.0002±0.<br>0001 | ND                | ND                 | 0.0005±0          | ND                | ND                | ND                | ND                | 0.0002±0.0<br>001 |
| <b>Sulfur-containing compounds<br/>(38)</b> |                                           |      |                   |                   |                    |                   |                   |                   |                   |                   |                   |
| 176                                         | 2-acetyl-3-methylthiophene                | 1745 | ND                | ND                | ND                 | 0.0035±0.<br>0005 | 0.0176±0.<br>0012 | 0.0078±0.<br>0006 | ND                | ND                | 0.0013±0.0<br>006 |
| 177                                         | 2-acetyl-5-methylthiophene                | 1852 | 0.0004±0.<br>0001 | ND                | 0.0002±0.0<br>000  | 0.0012±0.<br>0002 | ND                | 0.002±0.0<br>002  | ND                | 0.0005±0.<br>0001 | 0.0004±0.0<br>004 |
| 178                                         | 2-acetylthiazole                          | 1627 | 0.0039±0.<br>0009 | 0.004±0.0<br>002  | ND                 | 0.011±0.0<br>014  | 0.0153±0.<br>0013 | 0.0101±0.<br>0005 | 0.0007±0.<br>0002 | 0.0013±0.<br>0001 | 0.0004±0.0<br>004 |
| 179                                         | 3(2H)-thiophene, dihydro-2-<br>methyl-    | 1504 | 0.0608±0.<br>0238 | 0.0527±0.<br>0075 | 0.0298±0.0<br>021  | 0.2265±0.<br>0204 | 0.2362±0.<br>0217 | 0.1263±0.<br>0102 | 0.0231±0.<br>0051 | 0.0108±0.<br>0011 | 0.0133±0.0<br>010 |
| 180                                         | 3-acetyl-2,5-<br>dimethylthiophene        | 1789 | 0.0022±0.<br>0007 | 0.0025±0.<br>0003 | 0.0058±0.0<br>002  | ND                | ND                | ND                | ND                | ND                | ND                |
| 181                                         | 4-methylthiazole                          | 1297 | 0.0204±0.<br>0052 | 0.025±0.0<br>021  | ND                 | 0.0505±0.<br>0057 | 0.0956±0.<br>01   | 0.061±0.0<br>041  | 0.0142±0.<br>003  | 0.0218±0.<br>0015 | 0.0171±0.0<br>023 |
| 182                                         | 5-eththiazole                             | 1380 | 0.0016±0.<br>0004 | 0.002±0.0<br>002  | ND                 | ND                | 0.0077±0.<br>0009 | 0.0058±0.<br>0004 | 0.0007±0.<br>0002 | 0.0012±0.<br>0002 | 0.0009±0.0<br>005 |
| 183                                         | Carbon disulfide                          | 114  | ND                | ND                | ND                 | ND                | 0.1139±0.<br>0113 | 0.0583±0.<br>0036 | ND                | 0.0143±0.<br>0018 | 0.0135±0.0<br>011 |
| 184                                         | Carbonyl sulfide                          | 233  | ND                | ND                | ND                 | ND                | ND                | ND                | 0.0007±0.<br>0002 | ND                | ND                |
| 185                                         | Cyclohexyl isothiocyanate                 | 1651 | ND                | 0.0029±0.<br>0006 | ND                 | ND                | 0.0071±0.<br>0006 | ND                | ND                | 0.0021±0.<br>0001 | ND                |
| 186                                         | Dihydro-2(3H)-thiophene                   | 1620 | 0.0019±0.<br>0003 | 0.0058±0.<br>0004 | ND                 | 0.005±0.0<br>004  | 0.0206±0.<br>002  | 0.0207±0.<br>0015 | 0.0005±0.<br>0001 | 0.0024±0.<br>0002 | ND                |
| 187                                         | Dihydro-3-(2H)-thiophene                  | 1538 | 0.0159±0.<br>0062 | 0.0133±0.<br>0017 | 0.0377±0.0<br>041  | ND                | 0.057±0.0<br>055  | 0.0348±0.<br>0029 | 0.0039±0.<br>0008 | 0.0016±0.<br>0001 | ND                |
| 188                                         | Dimethyl sulfide                          | 714  | 0.0018±0.<br>0004 | 0.0031±0.<br>0009 | 0.0054±0.0<br>011  | ND                | 0.0219±0.<br>0024 | 0.0077±0.<br>0016 | 0.0028±0.<br>0005 | ND                | 0.0010±0.0<br>013 |
| 189                                         | Dimethyl sulfoxide                        | 1567 | ND                | ND                | 0.0033±0.0<br>030  | 0.0504±0.<br>0155 | 0.0482±0.<br>0057 | ND                | ND                | ND                | ND                |
| 190                                         | Dimethyl trisulfide                       | 1351 | 0.0005±0.<br>0001 | 0.0011±0.<br>0001 | ND                 | 0.0021±0.<br>0002 | 0.0053±0.<br>0007 | 0.0015±0.<br>0001 | 0.0053±0.<br>001  | 0.017±0.0<br>015  | 0.0070±0.0<br>004 |
| 191                                         | Dimethyl disulfide                        | 935  | 0.007±0.0<br>033  | 0.0147±0.<br>0013 | ND                 | 0.0244±0.<br>0061 | 0.0548±0.<br>0051 | 0.0275±0.<br>0022 | ND                | ND                | ND                |
| 192                                         | Methyl ethyl disulfide                    | 1058 | ND                | ND                | ND                 | ND                | ND                | ND                | ND                | 0.0016±0.<br>0001 | 0.0015±0.0<br>001 |
| 193                                         | Thiazole                                  | 1208 | 0.0084±0.<br>0024 | 0.0093±0.<br>002  | 0.0027±0.0<br>003  | 0.0266±0.<br>0039 | 0.0378±0.<br>0039 | 0.0271±0.<br>0024 | 0.0079±0.<br>0018 | 0.0087±0.<br>0014 | 0.0063±0.0<br>002 |
| 194                                         | Thiazole, 2,4,5-trimethyl-                | 1357 | 0.0005±0.<br>0002 | 0.0009±0.<br>0002 | 0.0004±0.0<br>0001 | 0.0016±0.<br>0002 | 0.0046±0.<br>0005 | 0.0035±0.<br>0002 | ND                | ND                | ND                |

|     |                                  |      |               |               |              |               |               |               |               |               |               |
|-----|----------------------------------|------|---------------|---------------|--------------|---------------|---------------|---------------|---------------|---------------|---------------|
| 195 | Thiazole, 2,4-dimethyl-          | 1293 | 0.0055±0.0019 | 0.0027±0.0002 | ND           | 0.0172±0.0055 | 0.0454±0.0045 | 0.021±0.004   | 0.0013±0.0006 | 0.0047±0.0006 | ND            |
| 196 | Thiazole, 4,5-dimethyl-          | 1350 | 0.0016±0.0005 | 0.0034±0.0004 | ND           | ND            | ND            | ND            | ND            | ND            | ND            |
| 197 | Thiazole 2-ethyl-                | 1706 | ND            | ND            | ND           | 0.0015±0.0002 | 0.0024±0.0004 | 0.002±0.004   | ND            | ND            | ND            |
| 198 | Thiazole 2-methyl-               | 1198 | ND            | ND            | ND           | 0.0062±0.0052 | 0.0086±0.0012 | 0.0228±0.002  | ND            | 0.0015±0.0001 | ND            |
| 199 | Thiazole, 4,5-dimethyl-          | 1350 | ND            | ND            | ND           | ND            | ND            | ND            | ND            | 0.0041±0.0005 | ND            |
| 200 | Thiazole, 5-methyl-              | 1260 | ND            | ND            | ND           | 0.0007±0.0001 | 0.0007±0.0001 | ND            | ND            | ND            | ND            |
| 201 | Thiophene                        | 765  | 0.0047±0.0026 | 0.01±0.006    | ND           | 0.0148±0.0051 | 0.0374±0.002  | ND            | 0.0111±0.0077 | 0.0242±0.0019 | ND            |
| 202 | Thiophene 2-(1-methylethyl)-     | 1243 | 0.0006±0.0002 | 0.0068±0.0008 | 0.0014±0.001 | 0.0056±0.0005 | 0.026±0.0028  | 0.0248±0.0018 | ND            | 0.0012±0      | ND            |
| 203 | Thiophene 2,3,4-trimethyl-       | 1321 | ND            | 0.0007±0.0001 | ND           | ND            | 0.0032±0.0004 | ND            | ND            | ND            | ND            |
| 204 | 2,5-dihydrothiophene             | 1003 | ND            | ND            | 0.0005±0.001 | ND            | ND            | ND            | ND            | ND            | ND            |
| 205 | Thiophene, 2,3-dihydro-5-methyl- | 1222 | ND            | ND            | ND           | 0.0021±0.0002 | 0.0133±0.0015 | 0.0082±0.0006 | ND            | ND            | ND            |
| 206 | 2,3-dimethylthiophene            | 1158 | ND            | ND            | ND           | 0.0013±0.0001 | 0.0044±0.0005 | 0.0048±0.0005 | ND            | 0.0026±0.0004 | 0.0024±0.001  |
| 207 | 2,4-dimethylthiophene            | 1131 | ND            | ND            | ND           | ND            | ND            | 0.0098±0.0018 | ND            | ND            | ND            |
| 208 | 2,5-dimethylthiophene            | 1092 | ND            | 0.0011±0.0001 | 0.0005±0.001 | 0.0017±0.0002 | 0.0038±0.0006 | ND            | ND            | ND            | ND            |
| 209 | Thiophene, 2-vinyl-              | 1316 | 0.001±0.0003  | 0.0029±0.0002 | 0.0095±0.004 | 0.0046±0.0005 | 0.0093±0.0012 | 0.0084±0.0006 | ND            | 0.0034±0.0002 | 0.0043±0.0010 |
| 210 | Thiophene 2-methyl               | 1023 | 0.0019±0.0009 | ND            | ND           | 0.0061±0.001  | 0.0008±0.0001 | 0.0009±0.0001 | ND            | 0.0649±0.0047 | 0.0538±0.0023 |
| 211 | Thiophene 3,4-diethyl-           | 1394 | ND            | 0.0014±0.0001 | 0.0053±0.007 | ND            | 0.0054±0.0006 | 0.0045±0.0003 | ND            | 0.0018±0.0001 | ND            |
| 212 | Thiophene 3-ethyl                | 1148 | ND            | ND            | ND           | ND            | ND            | ND            | ND            | 0.0014±0      | 0.0013±0.001  |
| 213 | Thiophene 3-methyl               | 1023 | ND            | 0.0044±0.001  | ND           | 0.0354±0.0062 | 0.0097±0.0014 | ND            | ND            | 0.0159±0.0009 | ND            |

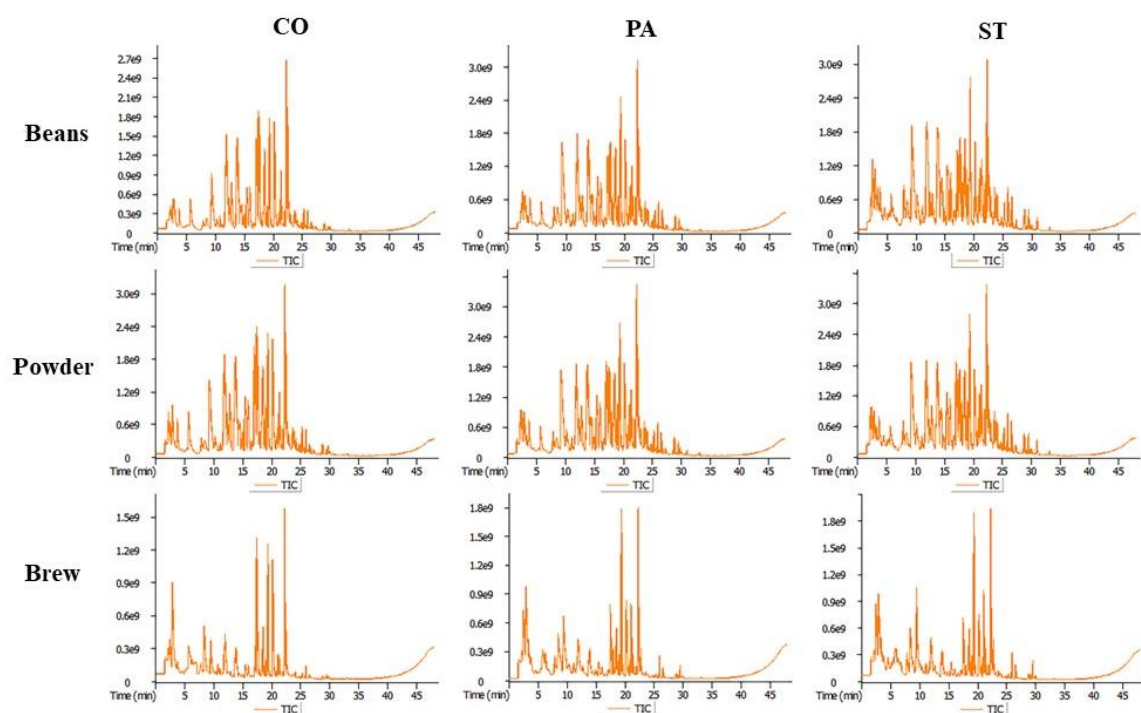

Figure S1. Total Ion flow chromatograms of three brands of coffee (CO, PA, ST) under different states states (beans, powder, and brews) from GC-TOF/MS

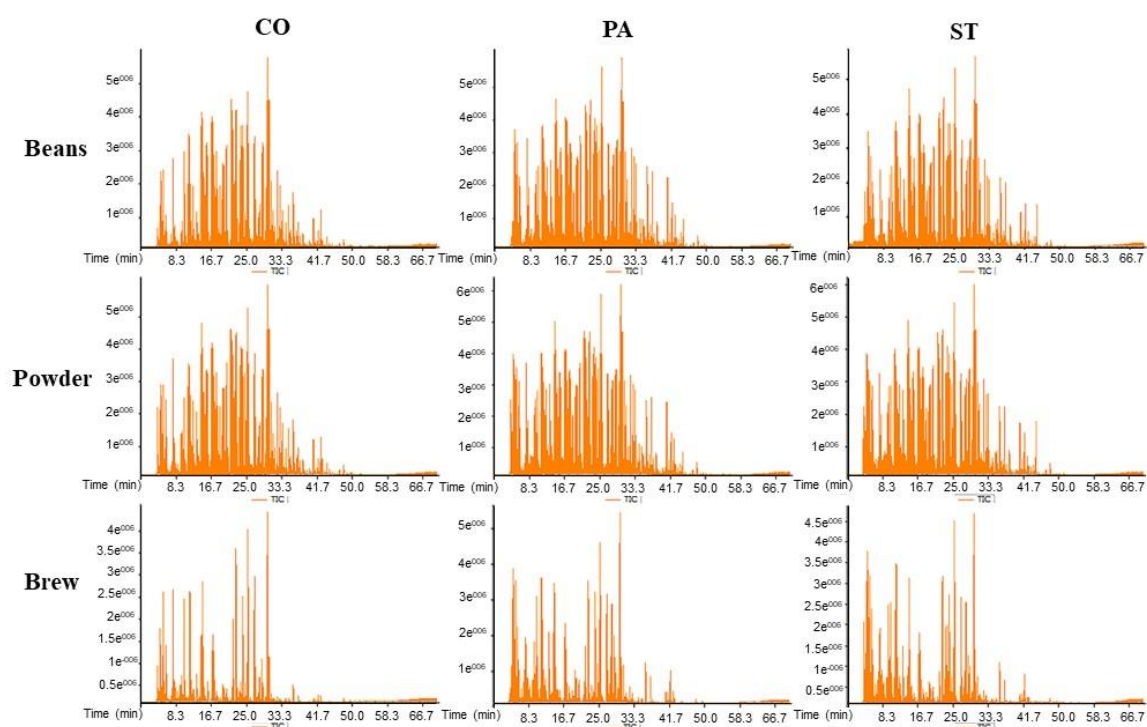

Figure S2. Total Ion flow chromatograms of three brands of coffee (CO, PA, ST) under different states states (beans, powder, and brews) from GCxGC-TOF/MS on the first column
